# Supplementary material for: The tendency of anemia of inflammation in periodontal diseases
Source: PubMed Central journal article supplement — Clin Sci (Lond). 2023 Feb 8;137(3):251–64. doi: 10.1042/CS20220524 (PMC9908573; doi:10.1042/cs20220524), 2023-02-08
Supplement: CS-2022-0524_supp.pdf [file CS-2022-0524_supp.pdf]

**Table S1.** Primers used for RT-qPCR

| Gene                                   | Forward primer (5' -3')   | Reverse primer (5' -3')   |
|----------------------------------------|---------------------------|---------------------------|
| Mouse- <i><math>\beta</math>-actin</i> | AGCCATGTACGTAGCCATCC      | TTTGATGTCACGCACGATTT      |
| Mouse- <i>HEPC</i>                     | CCTATCTCCATCAACAGATG      | AACAGATACCACACTGGGAA      |
| Mouse- <i>FTH</i>                      | TGCGCCAGAACTACCACCAG      | AGAGCCACATCATCTCGGTCAA    |
| Mouse- <i>FTL</i>                      | CCGTGCACTCTTCCAGGATGT     | CCTTATCCAGATAGTGGCTTTCCAG |
| Mouse- <i>FPN</i>                      | GTCATCCTCTGCGGAATCATCCTGA | GAGACCCATCCATCTCGGAAAGTGC |
